# Supplementary material
Source: publisher site journal article supplement (https://www.dovepress.com/article/475861)
Supplement: Supplementary file 1 [file get_supplementary_file.php]

**supplementary material (S1).** The detailed information about 35 cases in the study

| Number | Traditional microbial technology | Illumina sequencing | Nanopore sequencing | Final clinical diagnosis |
| --- | --- | --- | --- | --- |
| 1 | negative | Klebsiella pneumoniae（7），Mycobacterium bufo（1） | Human Herpsevirus 7 | infectious CAP (The pathogen is uncertain) |
| 2 | negative | Mycobacterium abscessus (1),Anellovirus (3),EpsteinnegativeBarr virus (4) | EpsteinnegativeBarr virus | infectious CAP (The pathogen is uncertain) |
| 3 | negative | Haemophilus influenzae（8046），Legionellaspp（8），Tropherymawhipplei（3），Streptococcus pneumoniae（2），Anellovirus（6） | Haemophilus influenzae（5979），Legionellaspp（4），Tropherymawhipplei（2），Mycobacterium intracellularis（3） | hemophilus influenzal pneumonia |
| 4 | negative | negative | Human Herpsevirus 7（2） | infectious CAP (The pathogen is uncertain) |
| 5 | negative | Moraxella catarrhalis (8）Anellovirus (21)Human herpersvirus 5 (38) | Human herpersvirus 5（21） | infectious CAP (The pathogen is uncertain) |
| 6 | Glactomannan test (+) | Klebsiella pneumoniae（4），Anellovirus（45），Human Herpsevirus 7（4） | Anellovirus，Human Herpsevirus 7 | pulmonary aspergillosis |
| 7 | negative | Klebsiella pneumoniae（40） | negative | Klebsiella pneumoniae pneumonia |
| 8 | negative | negative | negative | infectious CAP (The pathogen is uncertain) |
| 9 | negative | Schizophyllum commune (2,068) | Schizophyllum commune | Schizophyllum pneumonia |
| 10 | negative | EpsteinnegativeBarr virus | Human Herpsevirus 7、EpsteinnegativeBarr virus | infectious CAP (The pathogen is uncertain) |
| 11 | negative | negative | negative | infectious CAP (The pathogen is uncertain) |
| 12 | Cryptococcus capsular polysaccharide antigen：（+） | negative | Cryptococcus neoformans | Pulmonary cryptococcosis |
| 13 | negative | Moraxella catarrhalis (31,582)Nocardia (873)Pneumocystis jirovecii (4)Anellovirus (10)EpsteinnegativeBarr virus (116)Human herpersvirus 5 (26) | Moraxella catarrhalis、Nocardia、Pneumocystis jirovecii、Human herpersvirus 5、EpsteinnegativeBarr virus | Nocardiosis，Moraxella catarrhalis pneumonia |
| 14 | negative | negative | Cryptococcus neoformans（65） | Pulmonary cryptococcosis |
| 15 | negative | Aspergillus fumigatus | Aspergillus fumigatus | pulmonary aspergillosis |
| 16 | Klebsiella pneumoniae,Staphylococcus aureus、Candida albicans | Streptococcus intermedius (3)Haemophilus influenzae (6)Pseudomonas aeruginosa (3)Human herpersvirus 5 (121)EpsteinnegativeBarr virus (5) | Human herpersvirus 5、EpsteinnegativeBarr virus | infectious CAP (The pathogen is uncertain) |
| 17 | negative | Aspergillus niger (62),Anellovirus (64),EpsteinnegativeBarr virus (5) | Aspergillus niger、EpsteinnegativeBarr virus | pulmonary aspergillosis |
| 18 | Pseudomonas aeruginosa、Klebsiella pneumoniae | Tropherymawhipplei (4,758)，Pseudomonas aeruginosa (1,941)，Mycobacterium bufo (2)，Anellovirus (24) | Tropherymawhipplei、Pseudomonas aeruginosa | Pseudomonas aeruginosa pneumonia，Trophery whipplei pneumonia |
| 19 | GeneXpert （+） | Mycobacterium tuberculosis（116） | Mycobacterium tuberculosis（303） | Pulmonary tuberculosis |
| 20 | negative | Mycobacterium bufo（4）、Mycobacterium avium complex（1），Pneumocystis jirovecii（1） | negative | infectious CAP (The pathogen is uncertain) |
| 21 | Glactomannan test (+) | Pseudomonas aeruginosa (10)，Mycobacterium bufo (2)，Acinetobacter baumannii (2)，Aspergillus fumigatus (135)，Anellovirus (45)，EpsteinnegativeBarr virus (3) | Acinetobacter baumannii、Aspergillus fumigatus、EpsteinnegativeBarr virus | pulmonary aspergillosis |
| 22 | Stenotrophomonas Maltophilia，Glactomannan test (+) | Aspergillus fumigatus、EpsteinnegativeBarr virus | Aspergillus fumigatus、EpsteinnegativeBarr virus | pulmonary aspergillosis |
| 23 | negative | Nocardia asteroides (3) | negative | Nocardiosis |
| 24 | negative | negative | negative | infectious CAP (The pathogen is uncertain) |
| 25 | Cryptococcus neoformans，Cryptococcus capsular polysaccharide antigen：（+） | Legionellaspp (3)Cryptococcus neoformans (1,004)Anellovirus (14) | Legionellaspp（7）、Cryptococcus neoformans（128） | Pulmonary cryptococcosis |
| 26 | negative | Mycobacterium kansasii2456、Pneumocystis jirovecii229、Aspergillus fumigatus474 | Mycobacterium kansasii653、Pneumocystis jirovecii502、Aspergillus fumigatus24 | pulmonary aspergillosis、nontuberculous mycobacteria |
| 27 | negative | Human herpersvirus 5 (11) | Human herpersvirus 5 | infectious CAP (The pathogen is uncertain) |
| 28 | negative | Tropherymawhipplei(3)、Schizophyllum commune(42)、Cladosporium cladosporioides（12）、Anellovirus（37）、Human herpersvirus 5（983） | Human herpersvirus 5（212）、Anellovirus（25） | Schizophyllum pneumonia |
| 29 | Stenotrophomonas Maltophilia,Candida albicans | Enterobacter cloacae(13)、Mycobacterium avium complex(2)、Anellovirus(61)、Human herpersvirus 5(912)、Herpes simplex virus type 1（176） | Human herpersvirus 5（41）、Herpes simplex virus type 1（10） | infectious CAP (The pathogen is uncertain) |
| 30 | negative | negative | negative | Lung cancer |
| 31 | Candida albicans | negative | negative | cryptogenic organising pneumonia |
| 32 | negative | negative | negative | Anti-synthetase syndrome with interstitial lung disease |
| 33 | negative | negative | negative | Allergic pneumonia |
| 34 | negative | negative | negative | pneumoconiosis |
| 35 | negative | negative | negative | Low-protein-related pulmonary edema |

**Notes:** No.1 to 29 are infectious CAP, No.30 to 35 are non-infectious disease.
